# Supplementary material
Source: Springer Nature journal article supplement (https://www.springermedizin.de/resource/supplementary/12913_2012_2673_MOESM4_ESM.pdf/9531098)
Supplement: MOESM4 [file 9531098]

**Identification**

Records identified through database searching  
(n = 1062)

Additional records identified through other sources  
(n = 182)

Records after duplicates removed  
(n = 62)

**Screening**

Records screened  
(n = 1182)

Records excluded  
(n = 1120)

**Eligibility**

Full-text articles assessed for eligibility  
(n = 62)

Full-text articles excluded, with reasons  
(n = 35)

- description of information technique of PROs collection only(16)
- not including sufficient study endpoint(s) (12)
- not having sufficient quantitative analyses to enable assessment (7)

**Included**

Studies included in qualitative synthesis  
(n = 27)
